# Supplementary material
Source: publisher site journal article supplement (http://www.kjim.org/upload/media/kjim-2021-338-suppl2.pdf)
Supplement: Supplementary file 1 [file kjim-2021-338-suppl2.pdf]

**Supplementary Table 2. The comparison of cognitive function assessed by PHES between the groups and visits**

| Variable    | Baseline      |                             | Week 24      |                             | Change of values (24 weeks–baseline) |                             |                             |
|-------------|---------------|-----------------------------|--------------|-----------------------------|--------------------------------------|-----------------------------|-----------------------------|
|             | Value         | <i>p</i> value <sup>a</sup> | Value        | <i>p</i> value <sup>a</sup> | Difference                           | <i>p</i> value <sup>a</sup> | <i>p</i> value <sup>b</sup> |
| PHES score  |               | 0.951 <sup>c</sup>          |              | 0.131 <sup>c</sup>          |                                      | 0.129 <sup>c</sup>          |                             |
| Placebo     | –3 (–5 to –1) |                             | –2 (–4 to 0) |                             | 0 (0 to 2)                           |                             | 0.038 <sup>d</sup>          |
| L-carnitine | –3 (–5 to 0)  |                             | –2 (–4 to 1) |                             | 0 (0 to 2)                           |                             | < 0.001 <sup>d</sup>        |
| MHE         |               | 0.830 <sup>e</sup>          |              | 0.454 <sup>e</sup>          |                                      | 0.463 <sup>f</sup>          |                             |
| Placebo     | 21/72 (29.2)  |                             | 15/72 (20.8) |                             | 7/21 (33.3)                          |                             | 0.030 <sup>g</sup>          |
| L-carnitine | 19/69 (27.5)  |                             | 11/69 (15.9) |                             | 9/19 (47.4)                          |                             | 0.009 <sup>g</sup>          |
| CHE         |               | 0.211 <sup>e</sup>          |              | 0.272 <sup>e</sup>          |                                      | 0.678 <sup>f</sup>          |                             |
| Placebo     | 64/72 (88.9)  |                             | 29/72 (40.3) |                             | 35/64 (54.7)                         |                             | < 0.001 <sup>g</sup>        |
| L-carnitine | 57/70 (81.4)  |                             | 22/70 (31.4) |                             | 36/57 (63.2)                         |                             | < 0.001 <sup>g</sup>        |

Values are presented as median (interquartile range) or number (%).

PHES, psychometric hepatic encephalopathy score; MHE, minimal hepatic encephalopathy; CHE, covert hepatic encephalopathy.

<sup>a</sup>Comparison between the groups.

<sup>b</sup>Comparison within the groups.

<sup>c</sup>Independent *t* test or Wilcoxon rank sum test.

<sup>d</sup>Paired *t* test or Wilcoxon signed rank test.

<sup>e</sup>Chi-square test.

<sup>f</sup>Generalized Estimating Equations for the interaction effect of time × group.

<sup>g</sup>Generalized Estimating Equations for the time effect.
